# Supplementary material for: Chemokine Receptor 2 Is A Theranostic Biomarker for Abdominal Aortic Aneurysms
Source: bioRxiv or medRxiv preprint supplement (doi:10.1101/2023.11.06.23298031), 2023-11-07
Supplement: Supplementary file [file media-1.pdf]

**Supplemental Material for**

# **Chemokine Receptor 2 Is A Theranostic Biomarker for Abdominal Aortic Aneurysms**

**Santiago Elizondo-Benedetto<sup>1\*</sup>, Sergio Sastriques-Dunlop<sup>1\*</sup>, Lisa Detering<sup>2</sup>, Batool Arif<sup>1</sup>, Gyu Seong Heo<sup>2</sup>, Deborah Sultan<sup>2</sup>, Hannah Luehmann<sup>2</sup>, Xiaohui Zhang<sup>2</sup>, Xuefeng Gao<sup>2</sup>, Kitty Harrison<sup>2</sup>, Dakkota Thies<sup>2</sup>, Laura McDonald<sup>1</sup>, Christophe Combadière<sup>3</sup>, Chieh-Yu Lin<sup>4</sup>, Yeona Kang<sup>5</sup>, Jie Zheng<sup>2</sup>, Joseph Ippolito<sup>2</sup>, Richard Laforest<sup>2</sup>, Robert J. Gropler<sup>2</sup>, Sean J. English<sup>1</sup>, Mohamed A. Zayed<sup>1,2,6,7,8</sup>, Yongjian Liu<sup>2</sup>**

<sup>1</sup> Department of Surgery, Section of Vascular Surgery, <sup>2</sup> Department of Radiology, <sup>4</sup> Department of Pathology and Immunology, <sup>6</sup> Division of Molecular Cell Biology, <sup>7</sup> Department of Biomedical Engineering; Washington University School of Medicine, St. Louis, MO, USA

<sup>3</sup> Sorbonne Université, INSERM, CNRS, Centre d'Immunologie et des Maladies Infectieuses, Cimi-Paris, F-75013 Paris, France

<sup>5</sup> Department of Mathematics, Howard University, Washington D.C., USA

<sup>8</sup> Veterans Affairs St. Louis Health Care System, St. Louis, MO, USA

\*These authors contributed equally to this work.

**This PDF file includes:**

Supplemental Figures 1-7

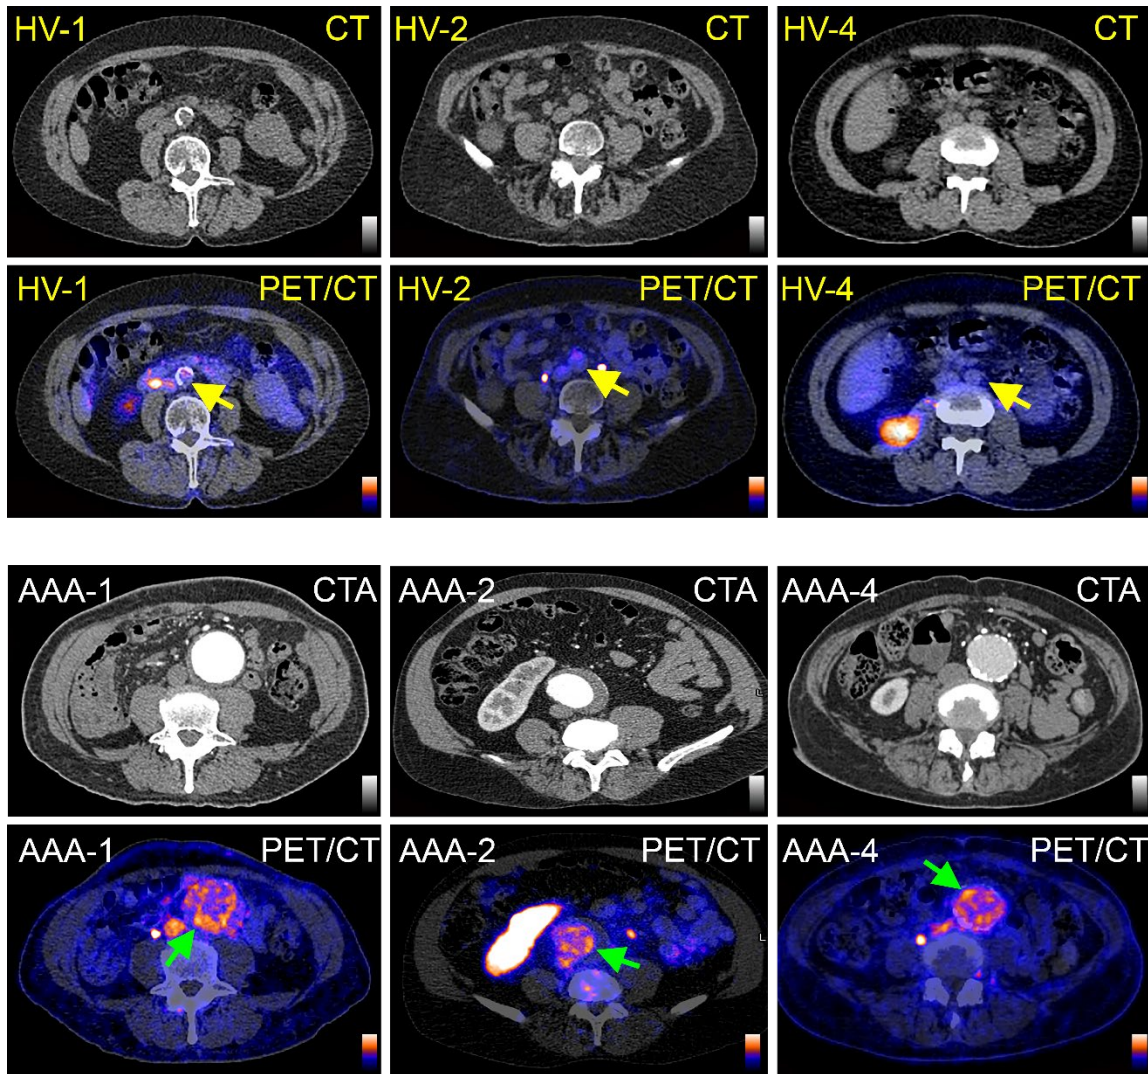

**Supplemental Figure 1.  $^{64}\text{Cu}$ -DOTA-ECL1i PET/CT images in healthy volunteers (HVs) and patients with AAA. Yellow arrow: transverse view of infrarenal aortas in HVs. Green arrow: transverse view of AAAs.**

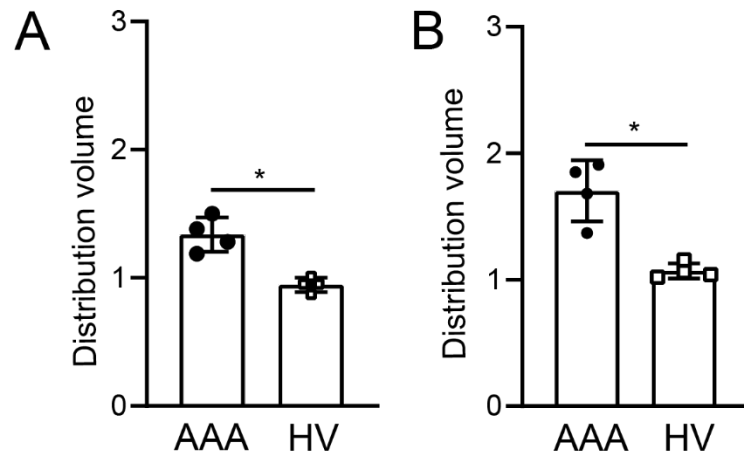

**Supplemental Figure 2. Distribution volume values for AAA patients and HV subjects. (A)** Multiple image-derived input functions obtained from upper aorta. **(B)** Multiple image-derived input functions obtained from upper vena cava.

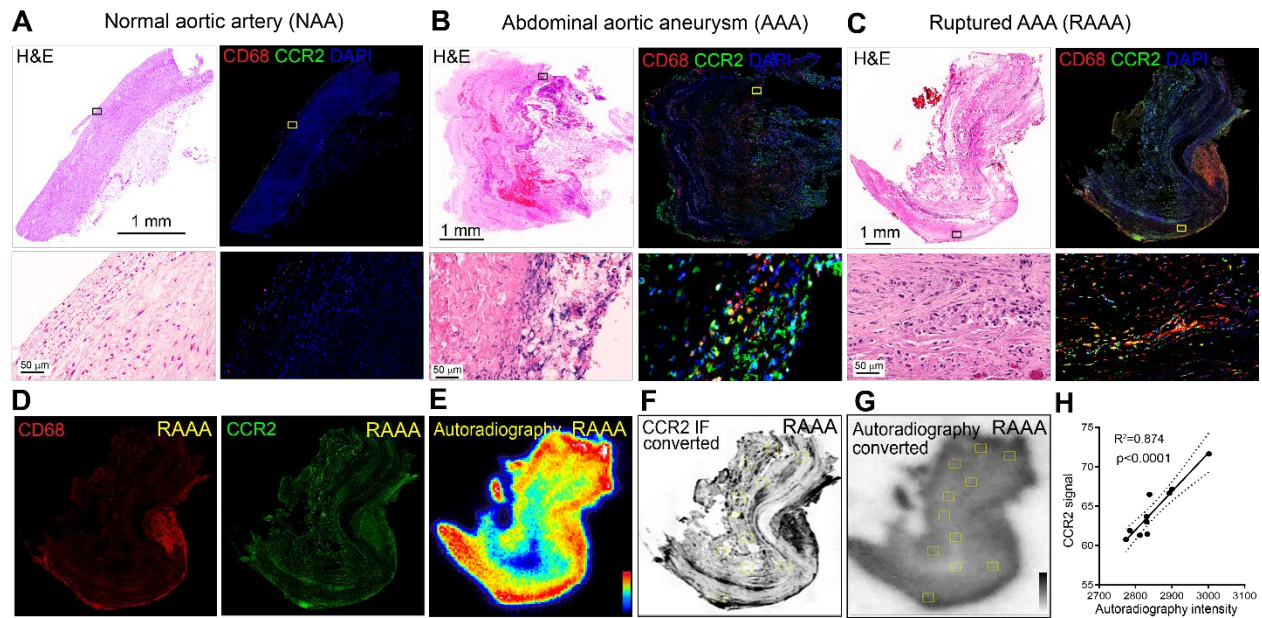

**Supplemental Figure 3. Characterization of CCR2 expression in human aortic artery tissues.** (A) Picture showing a human tissue of a healthy abdominal aortic artery (AA) stained with H&E and IF with CD68 and CCR2 specific antibodies. (B) Human sample of a non-ruptured abdominal aortic aneurysm (AAA) stained with H&E and IF with CD68 and CCR2 specific antibodies. (C) Human sample of a recently ruptured abdominal aortic aneurysm (RAAA) harvested during open surgical repair intervention, stained with H&E and IF with CD68 and CCR2 specific antibodies. (D) Representative picture of CD68+ and CCR2 + cells wall infiltration of RAAA human tissue respectively. (E)  $^{64}\text{Cu}$ -DOTA-ECL1i autoradiography of RAAA tissue. Converted low-resolution images of IF staining of CCR2 (F) and autoradiography (G). The two sets of images were co-registered with representative regions-of-interest (ROIs, yellow squares). (H) Signals extracted from the ROIs of the two sets of images showed linear correlation.

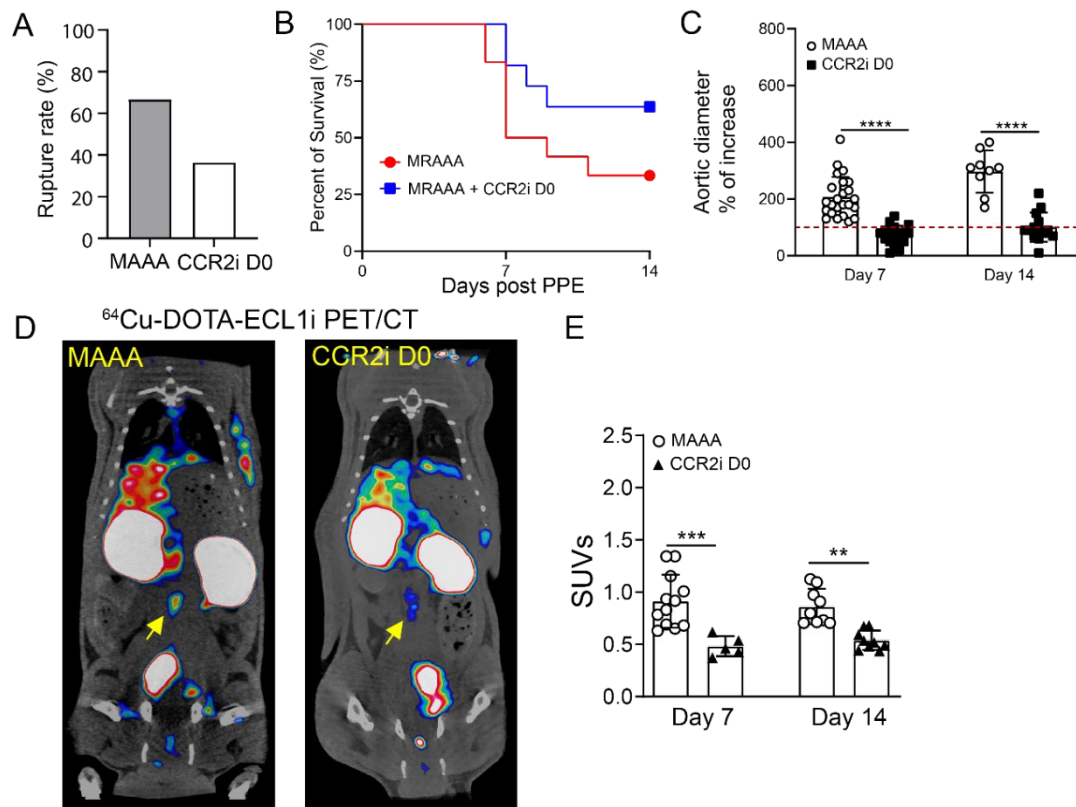

**Supplemental Figure 4. Assessment of CCR2 inhibition starting at day 0 on AAA progression and rupture in a MAAA rat model. (A)** Comparison of AAA rupture rates between MAAA rats without treatment and those treated with CCR2i starting at day 0 (CCR2i D0). **(B)** Kaplan-Meier curve demonstrating significantly improved survival of MAAA rats following CCR2i D0 treatment. **(C)** Percent aortic diameter increase in MAAA vs CCR2i D0 groups at day 7 and day 14, respectively. Red dotted line is set at 100%. **(D)** Representative  $^{64}\text{Cu}$ -DOTA-ECL1i PET/CT images at day 14 post PPE exposure showed specific and intense detection of AAA (yellow arrow) in MAAA, compared with the low trace accumulation in the CCR2i D0 treated group. **(E)** Quantitative tracer uptake in MAAA rats without and with CCR2i D0 treatment at day 7 and day 14 post PPE. Data presented as Mean  $\pm$  SD. \* $p < 0.05$ , \*\* $p < 0.01$ , \*\*\* $p < 0.001$ , \*\*\*\* $p < 0.0001$ .

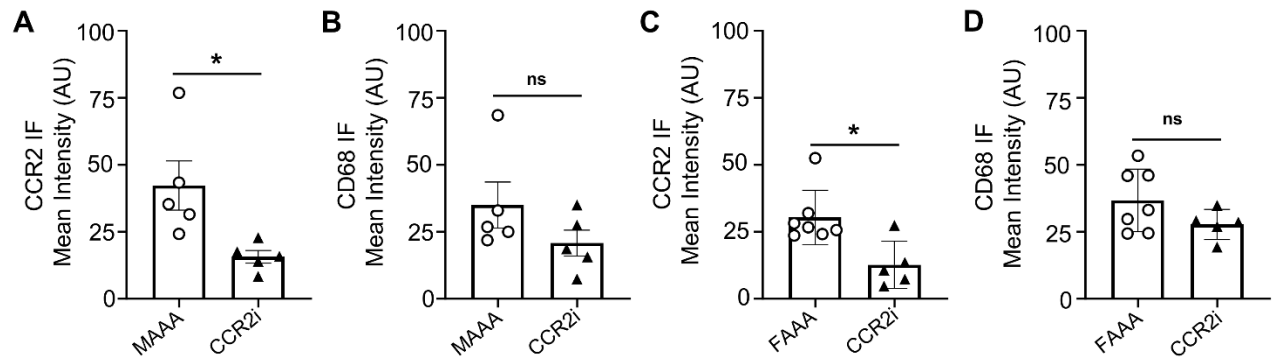

**Supplemental Figure 5. Quantification of immunofluorescence intensity of CCR2+ cells and CD68+ macrophages within AAA wall following CCR2 inhibition in MAAA and FAAA models. (A)** CCR2+ cells in non-treated MAAA vs CCR2i D3 (42±20 vs 16±5; respectively) in male rats. **(B)** CD68+ macrophages in non-treated MAAA vs CCR2i D3 (35±19, n=5 vs 21±10) in male rats. **(C)** CCR2+ cells in non-treated FAAA vs CCR2i D3 (30±10 vs 13±9) in FAAA. **(D)** CD68+ macrophages in non-treated FAAA vs CCR2i D3 (37±12, n=7 vs 28±6) in FAAA. Data presented as Mean ± SD. \*p < 0.05, \*\*p < 0.01, \*\*\*p < 0.001, \*\*\*\* p<0.0001.

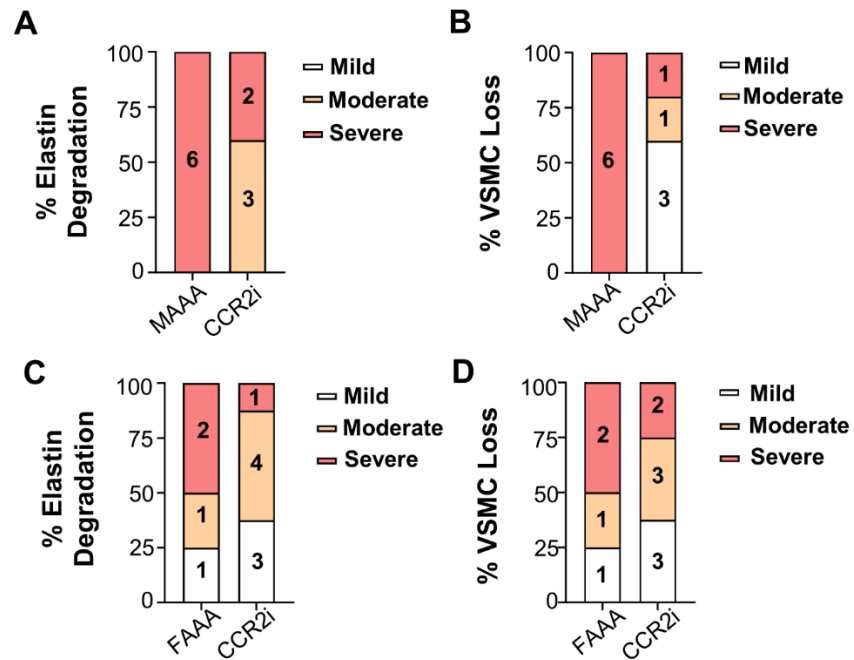

**Supplemental Figure 6. Histopathological characterization of AAA in male and female rats following CCR2i.** (A) Elastin degradation assessment in non-treated MAAA (n = 6 for severe) vs CCR2i in MAAA model (n= 3 for moderate and n = 2 for severe). (B) VSMC loss assessment in non-treated MAAA (n=6 severe) vs CCR2i (n=3 mild, n=1 moderate and n = 1 severe) in MAAA model. (C) Elastin degradation assessment in non-treated FAAA (n=1 mild, n= 1 moderate and n=2 for severe) vs CCR2i in FAAA model (n= 3 mild, n=4 moderate and n=1 severe). (D) VSMC loss assessment in non-treated FAAA (n=1 mild, n=1 moderate, n=2 severe) vs CCR2i in FAAA (n=3 mild, n=3 moderate and n = 2 severe).



|                 | Elastin Degradation                          | VSMC loss                              |
|-----------------|----------------------------------------------|----------------------------------------|
| <b>Mild</b>     | Mostly intact, with less than 10% disruption | Decrease nucleus density less than 10% |
| <b>Moderate</b> | Shredded elastin layers, 10-70% disruption   | 10-50%                                 |
| <b>Severe</b>   | More than 70% disruption                     | More than 50%                          |

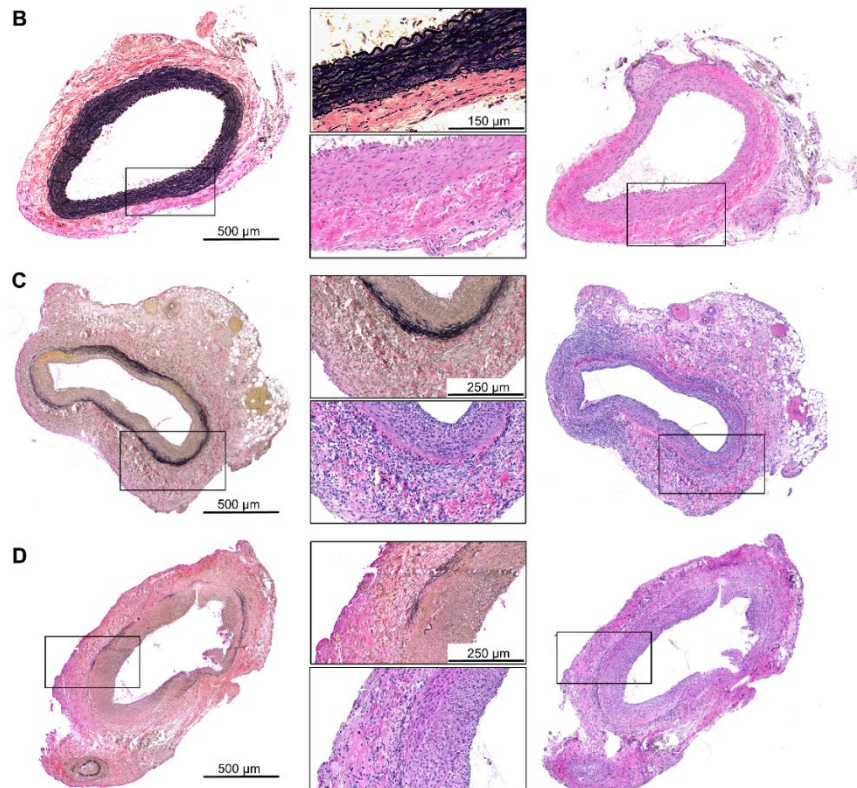

**Supplemental Figure 7. Histopathological grading system for rat AAA tissue. (A)**

Table with grading system and measured parameters: Elastin degradation (mild = mostly intact elastin fibers with less than 10% of disruption; moderate = shredded elastin layers with 10-70% of disruption and severe more than 70% of elastin fiber disruption) and VSMC loss (mild = decreased nucleus density; moderate = 10-50% of decrease in nucleus density; and severe >50% decrease in nucleus density, VSMC mostly gone). VVG and H&E staining of abdominal aortas (cross-sectional) with 5x magnification and 10x magnification to visualize elastin degradation and VSMC loss in rats aortic tissue with either (B) mild (C) moderate and (D) severe example of analysis.
